# Supplementary material
Source: Springer Nature journal article supplement (https://www.springermedizin.de/resource/supplementary/12889_2011_3562_MOESM8_ESM.pdf/9489332)
Supplement: MOESM8 [file 9489332]

**Table 3** Outcomes for studies on integrated delivery of mental health and substance abuse services

| Type of outcome      | Study                                                     | Measure                                                                                          | Outcome (Intervention vs. Control)                                                                                                                                                                                                                                                              |
|----------------------|-----------------------------------------------------------|--------------------------------------------------------------------------------------------------|-------------------------------------------------------------------------------------------------------------------------------------------------------------------------------------------------------------------------------------------------------------------------------------------------|
| Health outcomes      | Druss 2001                                                | Change in physical component summary index.<br>Change in mental component summary index.         | +4.7% vs. -0.3%, (p<0.001)<br>+2.4% vs. +2%, (p=0.84)                                                                                                                                                                                                                                           |
|                      | Krahn 2006                                                | Change in Centre for Epidemiological Studies Depression scale (CES-D) score.                     | Patients with all depression: -6.0 ± 12.0 vs. -7.8 ± 11.8, (p=0.07)<br>Patients with major depression: -7.5 ± 13.1 vs. -10.2 ± 12.1, (p=0.003)<br>Patients with all depression: +4.8 ± 12.6 vs. +4.9 ± 12.9, (p=0.88)<br>Patients with major depression: +5.9 ± 12.6 vs. + 6.8 ± 12.8, (p=0.32) |
|                      |                                                           | Change in Medical Component Score (MCS).                                                         |                                                                                                                                                                                                                                                                                                 |
|                      | Willenbring 1999                                          | Number of patients with 2-year survival.                                                         | 31/38 (81%) vs. 26/37 (70%), (p=0.03)                                                                                                                                                                                                                                                           |
| Drug and alcohol use | Oslin 2006                                                | Change in number of drinks per week.                                                             | -6.0 vs. -5.9 (p=0.913)                                                                                                                                                                                                                                                                         |
|                      |                                                           | Change in number of binge episodes in the preceding three months.                                | -8.5 vs. -10.2 (p=0.750)                                                                                                                                                                                                                                                                        |
|                      | Weisner 2001                                              | Total abstinence and duration of abstinence.                                                     | Non-SAMC patients: 66% vs. 73%, (p=0.23)<br>SAMC patients: 69% vs. 55%, (p=0.006);<br>period of abstinence 135 days vs. 122 days, (p=0.05)                                                                                                                                                      |
|                      |                                                           | Alcohol abstinence.                                                                              | Non-SAMC patients: 73% vs. 78% (p=0.41)<br>SAMC patients: 80% vs. 65%, (p=0.002)                                                                                                                                                                                                                |
|                      |                                                           | Other drug abstinence                                                                            | Non-SAMC patients: 84% vs. 87%, (p=0.50)                                                                                                                                                                                                                                                        |
| Willenbring 1999     | Number of patients with alcohol abstinence after 2 years. | 28/38 (74%) vs. 17/36 (48%), (p=0.02)                                                            |                                                                                                                                                                                                                                                                                                 |
| Patient satisfaction | Druss 2001                                                | Satisfaction score on 47-item questionnaire.                                                     | Patients in integrated model were more satisfied with overall care received in 6 of 8 domains ( <i>access, attention to patient preferences, courtesy, coordination, continuity, and overall care</i> ) (p<0.05 on all 6 domains)                                                               |
|                      | Gater 1997                                                | Score on Client Satisfaction Questionnaire (range 1-4; low score indicates higher satisfaction). | 1.86 vs. 2.23                                                                                                                                                                                                                                                                                   |
| Quality of care      | Druss 2001                                                | Delivery of preventive measures outlined in clinical guidelines.                                 | Patients in integrated model (n=59) more likely than in control group (n=61) to receive 15 of 17 measures,                                                                                                                                                                                      |

|                                |                  |                                                                                                                                                                                                                                            |                                                                                                                                                                                                                                                                                                                          |
|--------------------------------|------------------|--------------------------------------------------------------------------------------------------------------------------------------------------------------------------------------------------------------------------------------------|--------------------------------------------------------------------------------------------------------------------------------------------------------------------------------------------------------------------------------------------------------------------------------------------------------------------------|
|                                |                  |                                                                                                                                                                                                                                            | (p<0.01)                                                                                                                                                                                                                                                                                                                 |
|                                | Gater 1997       | Number of clinical needs met; and unmet.<br>Number of social needs met; and unmet.                                                                                                                                                         | 2.62 vs. 1.60, (p<0.001);<br>0.57 vs. 1.62 (p<0.001)<br>1.83 vs. 1.49, (p=NS); 0.86 vs. 1.64 (p<0.05)                                                                                                                                                                                                                    |
|                                | Watts 2007       | Patients who screened positive for depression and received treatment in accordance with guidelines.                                                                                                                                        | From 1.1% to 11.2% vs. from 3.0% to 0.7%, (p<0.001)                                                                                                                                                                                                                                                                      |
| <b>Utilisation of services</b> | Bartels 2004     | Mean number of mental health and substance abuse visits.<br>Appointment attendance.                                                                                                                                                        | 3.04 vs. 1.91 (p ≤0.001)<br><br>71% vs. 48.8% (95% CI=2.14 to 3.08)                                                                                                                                                                                                                                                      |
|                                | Druss 2001       | Patients who used a medical:<br>Primary care service;<br>Specialty service;<br>Emergency department;<br>Inpatient service.<br><br>Patients who used a mental health:<br>Outpatient service;<br>Emergency department;<br>Inpatient service. | 54/59 (91.5%) vs. 44/61 (72.1%), (p=0.006);<br>41/59 (69.5%) vs. 41/61 (67.2%), (p=0.17);<br>7/59 (11.9%) vs. 16/61 (26.2%), (p=0.04);<br>5/59 (8.5%) vs. 11/61 (18%), (p=0.12)<br><br>58/59 (98.3%) vs. 61/61 (100%), (p=0.31);<br>21/59 (35.6%) vs. 25/61 (41%), (p=0.31);<br>8/59 (13.6%) vs. 10/61 (16.4%), (p=0.66) |
|                                | Willenbring 1999 | Mean number of IOT visits in 2 years.<br>Mean number of IOT visits in first and last 6 months of treatment.                                                                                                                                | 42.2 ± 29.1 vs. 17.4 ± 15.6, (p<0.001)<br>From 14 to 9 vs. 4-6 in both periods                                                                                                                                                                                                                                           |
|                                | Watts 2007       | Patients who screened positive and were able to access mental health services.                                                                                                                                                             | 36.0% vs. 9%, (p<0.001)                                                                                                                                                                                                                                                                                                  |
| <b>Access to health care</b>   | Watts 2007       | Patients who screened positive and were able to access mental health services.                                                                                                                                                             | 36.0% vs. 9%, (p<0.001)                                                                                                                                                                                                                                                                                                  |
|                                | <b>Cost</b>      | Druss 2001                                                                                                                                                                                                                                 | Mean cost per subject treated                                                                                                                                                                                                                                                                                            |
|                                | Gater 1997       | Overall per capita health service cost                                                                                                                                                                                                     | US\$ 13,010 vs. US\$ 14,543<br>£ 1,406 vs. £ 1,199                                                                                                                                                                                                                                                                       |
|                                | Weisner 2001     | Average cost of all treatment per month                                                                                                                                                                                                    | US\$ 470.81 vs. US\$ 427.95, (p=0.14)                                                                                                                                                                                                                                                                                    |
